# Supplementary material
Source: PubMed Central journal article supplement (PMC4644497)
Supplement: NIHMS728862-supplement-01.pdf [file NIHMS728862-supplement-01.pdf]

909 **Supplemental Information**

910 **Materials and Methods**

911 *Mitochondrial activity analysis of “Brown-Fat-in-Microstrands”*

912 The XF Extracellular Flux Analyzer (XF24<sup>3</sup> model, Seahorse Bioscience, North Billerica, MA)  
913 was used to measure the oxygen consumption rate (OCR). After differentiation for 30 days,  
914 “Brown-Fat-in-Microstrands” were sliced into 12 of 1.5 mm pieces to cover the whole plate and  
915 placed in a Seahorse 24-well Islet Capture Microplate. All cells were incubated in XF assay  
916 medium in a non-CO<sub>2</sub> incubator for at least 30 minutes while XF Mito Stress Test drugs  
917 (Seahorse Bioscience) were loaded. The Extracellular Flux analysis and the Mito Stress Test  
918 were carried out as follows. Briefly, 1 μM oligomycin, 3.3 μM of FCCP, and 1 μM antimycin A  
919 were sequentially added to cells following the establishment of basal OCR readings to determine  
920 ATP-dependent OCR, maximal OCR and non-mitochondrial respiration, respectively. Three  
921 OCR readings were obtained following the addition of each drug.

922

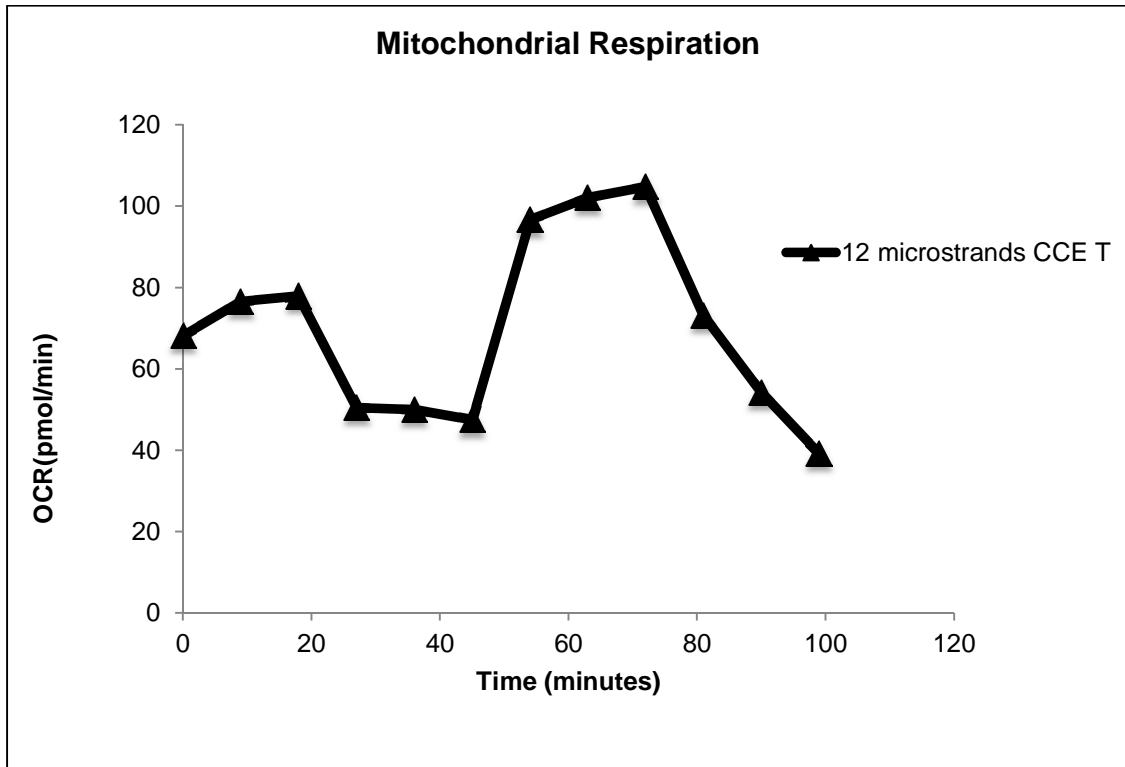

923

924 Figure S1. Mitochondrial respiration of “Brown-Fat-in-Microstrands”.
